# Supplementary material
Source: Springer Nature journal article supplement (https://www.springermedizin.de/resource/supplementary/12936_2012_2204_MOESM3_ESM.pdf/9542816)

- Dnase I  
- RT

+ Dnase I  
+ RT

3D7 F12

3D7 F12

C

Kb

1.0

0.8

0.6

0.4

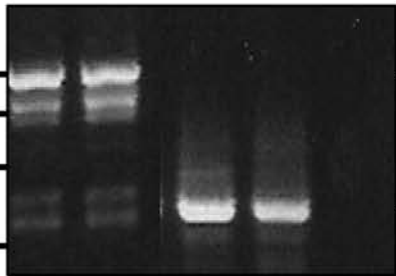

← gDNA

← cDNA

Supplement: MOESM3 [file 9542816]
